# Supplementary material for: Establishment of an Integrated CRISPR/Cas9 Plasmid System for Simple and Efficient Genome Editing in Medaka In Vitro and In Vivo
Source: MDPI journal article supplement (doi:10.3390/biology12020336), 2023-02-20
Supplement: s1 [file s1]

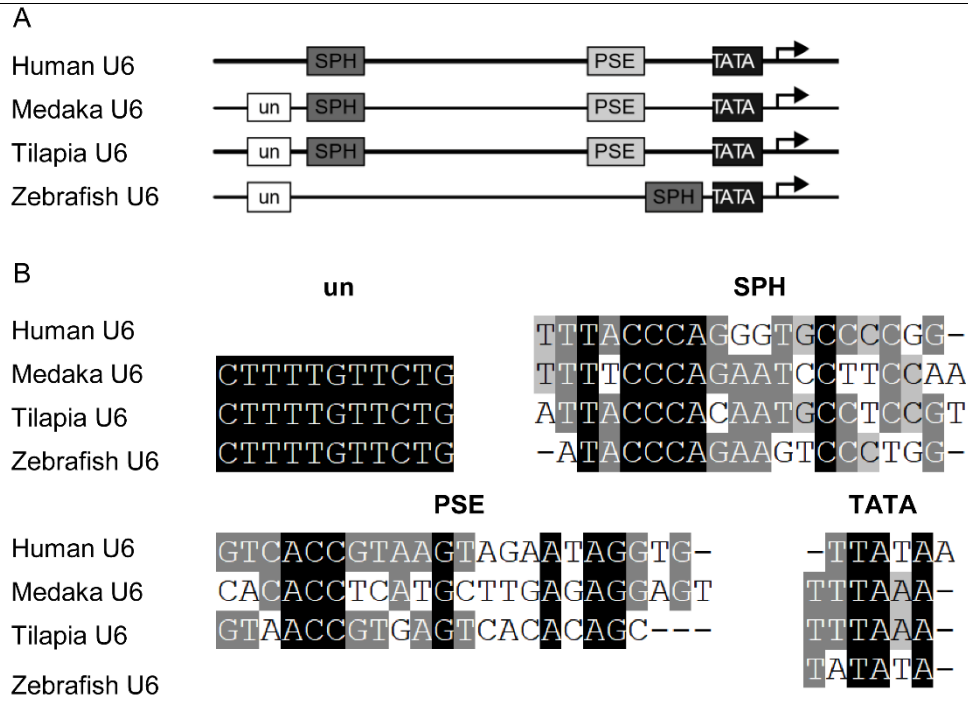

**Figure S1.** Analysis of U6 promoters from human and different fishes. **(A)** Diagram of sequence alignment of U6 promoters from human, medaka, Nile tilapia and zebrafish. **(B)** Nucleotide sequence of homology elements. un, an uncharacterized consensus; SPH, SphI postoctamer homology elements; PSE, proximal sequence elements; TATA, TATA box).

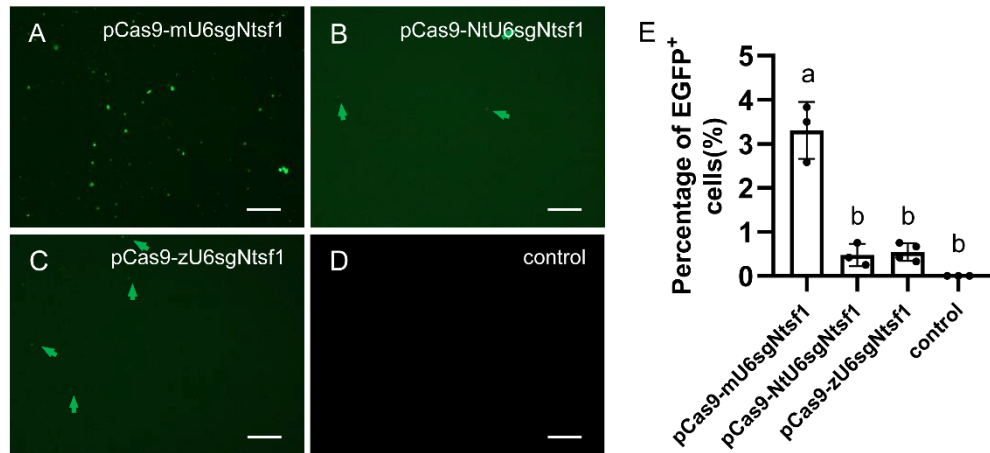

**Figure S2.** Monitoring the gene editing efficacy of pCas9-U6sgRNA in MES1 with pGNtsf1 reporter vector 48 h after transfection. **(A–D)** Co-transfection of pCas9-U6sgRNA targeting Nile tilapia *sf1* and pGNtsf1 in SG3. The sgRNA targeting Nile tilapia *sf1* in pCas9-U6sgRNA is driven by U6 promoters derived from medaka (pCas9-mU6sgNtsf1) **(A)**, Nile tilapia (pCas9-NtU6sgNtsf1) **(B)** and zebrafish (pCas9-zU6sgNtsf1) **(C)**, respectively. SG3 cells transfected only with pGNtsf1 were set as negative control **(D)**. (Scale bars, 100  $\mu$ m). **(E)** Quantification of the percentage of EGFP positive cells in different groups. Data are shown as means  $\pm$  standard derivation. Different letters above the bars represent significant differences between the groups ( $p < 0.05$ ).

|                |         |                                                         |     |
|----------------|---------|---------------------------------------------------------|-----|
| <i>ptch1</i>   | Exon1:  | AGAC <b>CCCT</b> GATCGGCCGAGGATAACGCGGAGGAA             | WT  |
|                | sgRNA1  | AGACCCCTGAT <b>T</b> CGGCCGAGGATAACGCGGAGGAA            | +1  |
|                | Exon2:  | CCAGACG <b>CCA</b> CGCGAAGAGGGAGCCAACGTTCTG             | WT  |
|                | sgRNA2: | CCAGACGCCA-----ACGTTCTG                                 | -16 |
|                | sgRNA2: | CCA-----TG                                              | -29 |
|                |         |                                                         |     |
| <i>ptch2</i>   | Exon1:  | A <b>ACCC</b> AGACCTCATCCGGAGACCCAGCTACTGCC             | WT  |
|                | sgRNA1  | AACCCAG-----CTACTGCC                                    | -19 |
|                | Exon2:  | A <b>CCCC</b> CGAGTTATACGCGCTCCCAGCCGCTTGCG             | WT  |
|                | sgRNA2: | ACCCCGAG <b>G</b> TTATACGCGCTCCCAGCCGCTTGCG             | +1  |
| <i>tmem104</i> | Exon1:  | GCTGAGGAT <b>CCCC</b> AACGCCAAACATGG <b>CCGG</b> CGG    | WT  |
|                | sgRNA1  | GCTGAGGATCCCCAACGCCAAACAT <b>T</b> GGCCGGCG             | +1  |
|                |         | GCTGAGGATC-----GGCCGGCG                                 | -15 |
|                | Exon2:  | ACGGCTCT <b>CCT</b> CTGTCCGTGATGCC <b>CG</b> CGCCATG    | WT  |
|                | sgRNA2: | ACGGCTCTCCTCTGTCCGTGATGC--GCCGGCCATG                    | -1  |
|                |         |                                                         |     |
| <i>sytl5</i>   | Exon1:  | GGAGGACCTGAACCTCTCATTCTGCT <b>GG</b> ATCATG             | WT  |
|                | sgRNA1  | GGAGGACCTGAAC-----TGCTGGATCATG                          | -10 |
|                | Exon2:  | CTAA...AACAAGAGGAGAAAAGGAT <b>C</b> <b>CGG</b> ...TCAAC | WT  |
|                | sgRNA2: | CTAA-----TCAAC                                          | -75 |

**Figure S3.** Target site design and mutation type detection of endogenous genes *ptch1*, *ptch2*, *sytl5* and *tmem104* in medaka cultured cells. The sgRNA target sites are indicated by underline and PAM sequences are indicated in bold. PCR amplicons of genomic DNA from each group were sub-cloned into plasmid followed by sequencing and sequencing results indicating different mutations were listed. Base insertions are shown in red font, and base deletions are shown in dashes.

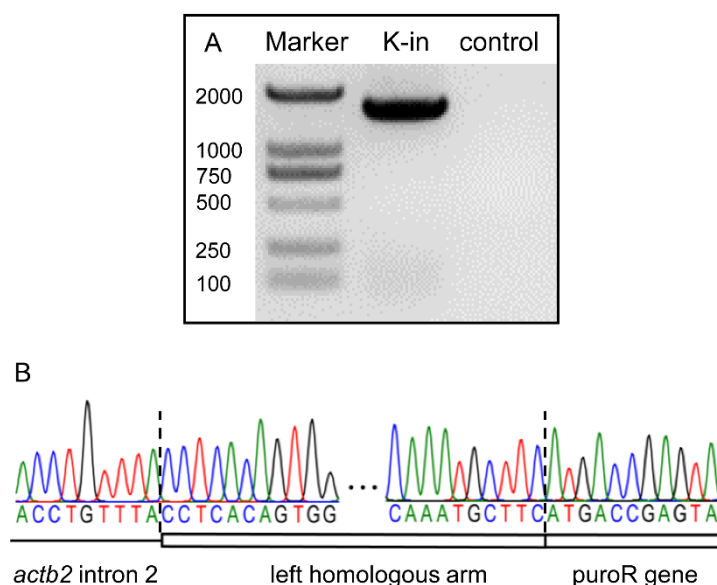

**Figure S4.** (A) Knock-in detection by specific primer pair. Knock-in detection primer pair was used to amplify corresponding genomic DNA. Amplicon was separated with agarose gel electrophoresis. K-in lane was amplicon from genomic DNA of pCas9-mU6sgactb2 and donor plasmid co-transfected SG3 cells. Control lane was amplicons from DNA of wild-type genome. (B) Sequencing chromatogram of amplicon of genomic DNA from pCas9-mU6sgactb2 and donor plasmid co-transfected SG3 cells. Result shown the correct conjunction between actb2 intron 2, left homologous arm, and puromycin resistance gene. puroR, puromycin resistance gene.

**Table S1.** Sequences of the primers used in this study.

| Usage                             | Primer Names       | Primer Sequence (5'-3')                            |
|-----------------------------------|--------------------|----------------------------------------------------|
| Gene editing plasmid construction | U6Mlu-F            | CTTGACGAGTTCTTCTGAACGCGTCTCGAGCCTCTAGA             |
|                                   | scaffoldSal-R      | AATTGGCGGTCGACTGGCGTAATAGCCAAC                     |
|                                   | mU6sgptch1-R1      | TGATCGGCCGAGGATAACGCCGATGAGCCAAAGTCTCTGAG          |
|                                   | sgptch1-F1         | CGGTTATCCTCGGCCGATCAGTTTTAGAGCTAGAAATAGCAAGTTAAAAT |
|                                   | mU6sgptch1-R2      | CGCGAAGAGGGAGCCAAACGTCGATGAGCCAAAGTCTCTGAG         |
|                                   | sgptch1-F2         | ACGTTGGCTCCCTCTTCGCGGTTTTAGAGCTAGAAATAGCAAGTTAAAAT |
|                                   | mU6sgptch2-R1      | AGACCTCATCCGGAGACCCACGATGAGCCAAAGTCTCTGAG          |
|                                   | sgptch2-F1         | TGGGTCTCCGGATGAGGTCTGTTTTAGAGCTAGAAATAGCAAGTTAAAAT |
|                                   | mU6sgptch2-R2      | CGAGTTATACGCGTCCCAGCGATGAGCCAAAGTCTCTGAG           |
|                                   | sgptch2-F2         | CTGGGAGCGCGTATAACTCGGTTTTAGAGCTAGAAATAGCAAGTTAAAAT |
|                                   | mU6sgtmem104-R1    | GCCATGTTTGGCGTTGGGGACGATGAGCCAAAGTCTCTGAG          |
|                                   | sgtmem104-F1       | TCCCCAACGCCAAACATGGCGTTTTAGAGCTAGAAATAGCAAGTTAAAAT |
|                                   | mU6sgtmem104-R2    | GCGGCATCACGGACAGAGGACGATGAGCCAAAGTCTCTGAG          |
|                                   | sgtmem104-F2       | TCCTCTGTCCGTGATGCCGCGTTTTAGAGCTAGAAATAGCAAGTTAAAAT |
|                                   | mU6sgsytl5-R1      | GCAGAAATGAGAGGTTTCAGGCGATGAGCCAAAGTCTCTGAG         |
|                                   | sgsytl5-F1         | CCTGAACCTCTCATTTCTGCGTTTTAGAGCTAGAAATAGCAAGTTAAAAT |
|                                   | mU6sgsytl5-R2      | GATCCTTTTCTCCTCTTGTTCGATGAGCCAAAGTCTCTGAG          |
|                                   | sgsytl5-F2         | AACAAGAGGAGAAAAGGATCGTTTTAGAGCTAGAAATAGCAAGTTAAAAT |
|                                   | mU6sgsall4-R1      | ACCGATGAATTCAGACCCTGCGATGAGCCAAAGTCTCTGAG          |
|                                   | sgsall4-F1         | CAGGGTCTGAATTCATCGGTGTTTTAGAGCTAGAAATAGCAAGTTAAAAT |
|                                   | mU6sgNtsf1-R1      | CCCAGTACCAGTACACAGCCCGATGAGCCAAAGTCTCTGAGTG        |
|                                   | sgNtsf1-F1         | GGCTGTGTACTGGTACTGGGGTTTTAGAGCTAGAAATAGCAAGTTAAAAT |
| Mutation detection                | ptch1-TIDE-F1      | AGCCGAAGACTCGTGTATGG                               |
|                                   | ptch1-TIDE-R1      | CAGGTTAACGCAGAAGCCAC                               |
|                                   | ptch1-TIDE-F2      | TTAATGGGGGATGCCAGTCA                               |
|                                   | ptch1-TIDE-R2      | TGGGAGTTCTCACCTGATCC                               |
|                                   | ptch2-TIDE-F1/2    | TCGGCGCATAATGTTGGGA                                |
|                                   | ptch2-TIDE-R1/2    | CTGTAACACGTCCAAGCATCC                              |
|                                   | tmem104g1/2-TIDE-F | GTGTGGTTACATGCCAAGGTG                              |
|                                   | tmem104g1/2-TIDE-R | CTGACGAGTGCAGAAGGTGA                               |
|                                   | sytl5-TIDE-F1/2    | GATCCTCGTAAGGCTGGTGT                               |
|                                   | sytl5-TIDE-R1/2    | CTCACAGAGTTCTCCCCGGTC                              |
|                                   | ptch1-PAGE-F1      | CTAATGCACCCTCCGAACAG                               |
|                                   | ptch1-PAGE-R1      | ATCGCAGTAACTCGGTCGCT                               |
|                                   | ptch1-PAGE-F2      | GGTGGGCGAGTAAACCAAGA                               |
|                                   | ptch1-PAGE-R2      | ACATGAACTCTACTGGCTCGC                              |
|                                   | ptch2-PAGE-F1      | TGGACTATGGCCTCGGATCG                               |
|                                   | ptch2-PAGE-R1      | GTTTAAGTGCAGAAAGCAGCGT                             |
|                                   | ptch2-PAGE-F2      | CTTTGGACTATGGCCTCGGAT                              |
|                                   | ptch2-PAGE-R2      | CCGCATCACCTTGGATATCTGT                             |
|                                   | tmem104-PAGE-F1/2  | AACCTTCTCTCACACGGCAG                               |
|                                   | tmem104-PAGE-F1/2  | TCACAAACGGAGAGTACGGC                               |
|                                   | sytl5-PAGE-F1/2    | TTTACCCAAAGGAGCCAATGGA                             |
|                                   | sytl5-PAGE-R1/2    | GAAGCGTTGATGGAATGGTGA                              |
| Reporter plasmid construction     | Ntsf1-GFP-F1       | CCCAGTACCAGTACACAGCCCGAGGGCGAGGGCGATGCCA           |
|                                   | GFP-Ntsf1-R1       | GGCTGTGTACTGGTACTGGGTGGCATCGCCCTCGCCCTCG           |
|                                   | GFP-F              | GACCACCAGGGCAAGGGTCTG                              |
|                                   | GFP-R              | CCAAACTCATCAATGTATCTTATC                           |

|                       |           |                         |
|-----------------------|-----------|-------------------------|
| Knock-in<br>detection | knockin-F | GCACCACACCTTCTACAATGAGC |
|                       | knockin-R | GACGCGCGTGAGGAAGAGTTC   |

**Table S2.** Candidate off-target sequences and corresponding detection primer pairs.

| Usage                   | Primer Names         | Primer Sequence (5'-3') | Candidate off -Target Sequence (5'-3') |
|-------------------------|----------------------|-------------------------|----------------------------------------|
| Off-target<br>detection | Ptch1gRNA1-off1-F1   | ACATATGTGGCTCCATCGGTT   | CCGCTCTCCTCGGCGGATCATGG                |
|                         | Ptch1gRNA1-off1-R1   | ACACTTCTCAGGTCGGTTCAC   |                                        |
|                         | Ptch1gRNA2-off1-F1   | GACCGACATCCCTACGAGGAC   | AAGATGGCGCCCTCTTCTCGAGG                |
|                         | Ptch1gRNA2-off1-R1   | GTTAATCCAGCGTCAGCGGT    |                                        |
|                         | tmem104gRNA1-off1-F1 | ACACAACATTAGTAAAACTGCAT | GCCTAAACGCCTAACATGGCTGG                |
|                         | tmem104gRNA1-off1-R1 | GAATTGATTAGCCCGGCCTATG  |                                        |
|                         | tmem104gRNA1-off2-F1 | TCACAGAGCTGCCAGAGTAACAC | TGCCCAACGCCAGACATGGAGGG                |
|                         | tmem104gRNA1-off2-R1 | CCATTTATCCTGCCATTGAAGCT |                                        |
